# Supplementary material for: Natural variation reveals that OsSAP16 controls low-temperature germination in rice
Source: PubMed Central journal article supplement (PMC5853544; doi:10.1093/jxb/erx413), 2017-12-11
Supplement: erx413_suppl_supplementary_tables_and_figures.pdf [file erx413_suppl_supplementary_tables_and_figures.pdf]

**Supplemental Table S1.** Previous identified QTLs of LTG.

| QTL              | Chromosome | Trait                        | Reference          |
|------------------|------------|------------------------------|--------------------|
| <i>qLTG3-1</i>   | 3          | GR for 7d (15 °C)            | Fujino et al. 2004 |
| <i>qLTG3-2</i>   | 3          |                              |                    |
| <i>qLTG4</i>     | 4          |                              |                    |
| <i>qLVG2</i>     | 2          | vigor of germination (14 °C) | Han et al. 2006    |
| <i>qLVG3</i>     | 3          |                              |                    |
| <i>qLVG5</i>     | 5          |                              |                    |
| <i>qLVG6</i>     | 6          |                              |                    |
| <i>qLVG7-1</i>   | 7          |                              |                    |
| <i>qLVG7-2</i>   | 7          |                              |                    |
| <i>qLVG8</i>     | 8          |                              |                    |
| <i>qLVG11</i>    | 11         |                              |                    |
| <i>qLTG-9</i>    | 9          | GR for 4,5d (15 °C)          | Li et al. 2013     |
| <i>qLTG-7</i>    | 7          |                              |                    |
| <i>qLTG-12</i>   | 12         |                              |                    |
| <i>qLTG-5-1</i>  | 5          | GR for 7-15d (15 °C)         | Jiang et al. 2006  |
| <i>qLTG-5-2</i>  | 5          |                              |                    |
| <i>qLTG-5-3</i>  | 5          |                              |                    |
| <i>qLTG-4</i>    | 4          |                              |                    |
| <i>qLTG-3</i>    | 3          |                              |                    |
| <i>qLTG-9</i>    | 9          |                              |                    |
| <i>qLTG-10</i>   | 10         |                              |                    |
| <i>qLTG-11-1</i> | 11         |                              |                    |
| <i>qLTG-11-2</i> | 11         |                              |                    |
| <i>qGR-2</i>     | 2          | GR for 6-10d (15 °C)         | Ji et al. 2009     |
| <i>qGR-3</i>     | 3          |                              |                    |
| <i>qGR-7</i>     | 7          |                              |                    |
| <i>qGR-10</i>    | 10         |                              |                    |
| <i>qGR-11</i>    | 11         |                              |                    |
| <i>qGR-12</i>    | 12         |                              |                    |
| <i>qGI-2</i>     | 2          | GI for 10d (15 °C)           |                    |
| <i>qGI-7</i>     | 7          |                              |                    |
| <i>qGI-10</i>    | 10         |                              |                    |
| <i>qGI-11</i>    | 11         |                              |                    |

**Supplemental Table S2.** Information of 187 accessions and phenotypic value of LTGP and LTGI

| ID        | Plant name           | groups | LTGP   | LTGI   |
|-----------|----------------------|--------|--------|--------|
| NSFTV_4   | NSF-TV 4             | AUS    | 0.2667 | 0.159  |
| NSFTV_6   | ARC 7229             | AUS    | 0      | 0      |
| NSFTV_13  | NSF-TV 13            | AUS    | 0.9231 | 0.4024 |
| NSFTV_18  | BJ 1                 | AUS    | 0.5    | 0.2179 |
| NSFTV_19  | Black Gora           | AUS    | 0.3667 | 0.2462 |
| NSFTV_33  | Chuan 4              | AUS    | 0.0345 | 0.1512 |
| NSFTV_44  | Dhala Shaitta        | AUS    | 0.1481 | 0.1111 |
| NSFTV_78  | Jhona 349            | AUS    | 0.8148 | 0.4188 |
| NSFTV_85  | Kasalath             | AUS    | 0      | 0.0051 |
| NSFTV_88  | Khao Gaew            | AUS    | 0      | 0.0168 |
| NSFTV_105 | Mehr                 | AUS    | 0.6897 | 0.3263 |
| NSFTV_131 | Phudugey             | AUS    | 0.25   | 0.1264 |
| NSFTV_200 | P 737                | AUS    | 0.3077 | 0.2041 |
| NSFTV_228 | CA 902/B/2/1         | AUS    | 0.75   | 0.4038 |
| NSFTV_261 | Shim Balte           | AUS    | 0.7586 | 0.3263 |
| NSFTV_262 | Halwa Gose Red       | AUS    | 0      | 0      |
| NSFTV_276 | Kaukau               | AUS    | 0.0333 | 0.0308 |
| NSFTV_312 | Aswina 330           | AUS    | 0.0714 | 0.1126 |
| NSFTV_314 | CTG 1516             | AUS    | 0.1724 | 0.1194 |
| NSFTV_316 | DD 62                | AUS    | 0.5313 | 0.2524 |
| NSFTV_317 | DJ 123               | AUS    | 0.1724 | 0.1406 |
| NSFTV_319 | DK 12                | AUS    | 0      | 0.0769 |
| NSFTV_320 | DM 43                | AUS    | 0      | 0.0641 |
| NSFTV_321 | DM 56                | AUS    | 0.3929 | 0.239  |
| NSFTV_322 | DM 59                | AUS    | 0.5357 | 0.2445 |
| NSFTV_323 | DNJ 140              | AUS    | 0      | 0.037  |
| NSFTV_324 | DV 123               | AUS    | 0      | 0.0769 |
| NSFTV_327 | Goria                | AUS    | 0.9333 | 0.4385 |
| NSFTV_328 | Jamir                | AUS    | 0.1429 | 0.1429 |
| NSFTV_330 | Khao Pahk Maw        | AUS    | 0.6087 | 0.2742 |
| NSFTV_341 | Shirkati             | AUS    | 0.8846 | 0.429  |
| NSFTV_359 | Surjamkuhi           | AUS    | 0      | 0.0385 |
| NSFTV_360 | PTB 30               | AUS    | 0      | 0      |
| NSFTV_369 | Sathi                | AUS    | 0.9643 | 0.6154 |
| NSFTV_370 | Coarse               | AUS    | 0.6207 | 0.2626 |
| NSFTV_372 | Sufaid               | AUS    | 0.0769 | 0.071  |
| NSFTV_378 | Kalubala Vee         | AUS    | 0      | 0      |
| NSFTV_3   | Ai-Chino-Hong        | IND    | 0      | 0.041  |
| NSFTV_21  | Byakkoku Y 5006 Seln | IND    | 0.4    | 0.2051 |
| NSFTV_29  | Chau                 | IND    | 0.4667 | 0.2077 |
| NSFTV_57  | NSF-TV 57            | IND    | 0      | 0      |
| NSFTV_71  | IR 36                | IND    | 0.8333 | 0.3154 |
| NSFTV_72  | IR 8                 | IND    | 0.8611 | 0.3526 |
| NSFTV_76  | Jaya                 | IND    | 0.8333 | 0.3821 |
| NSFTV_90  | Kiang-Chou-Chiu      | IND    | 0.7    | 0.3769 |
| NSFTV_97  | Kun-Min-Tsieh-Hunan  | IND    | 0.6333 | 0.2821 |
| NSFTV_106 | Ming Hui             | IND    | 0      | 0.024  |
| NSFTV_109 | MTU9                 | IND    | 0.8387 | 0.4194 |
| NSFTV_117 | O-Luen-Cheung        | IND    | 0.125  | 0.1082 |
| NSFTV_125 | Pao-Tou-Hung         | IND    | 0      | 0      |
| NSFTV_129 | Peh-Kuh              | IND    | 0      | 0      |
| NSFTV_130 | Peh-Kuh-Tsao-Tu      | IND    | 0.1034 | 0.0345 |
| NSFTV_132 | Rathuwee             | IND    | 0      | 0      |
| NSFTV_137 | RTS14                | IND    | 0.1    | 0.1615 |

|           |                         |     |        |        |
|-----------|-------------------------|-----|--------|--------|
| NSFTV_142 | Shai-Kuh                | IND | 0.7778 | 0.3162 |
| NSFTV_156 | Taichung Native 1       | IND | 0.3824 | 0.19   |
| NSFTV_171 | ZHE 733                 | IND | 0.931  | 0.5093 |
| NSFTV_172 | Zhenshan 2              | IND | 0.7429 | 0.4286 |
| NSFTV_178 | ARC 6578                | IND | 0.6897 | 0.3156 |
| NSFTV_189 | Criollo La Fria         | IND | 0.6207 | 0.2759 |
| NSFTV_203 | Radin Ebos 33           | IND | 0.7586 | 0.321  |
| NSFTV_209 | Tchibanga               | IND | 0.0714 | 0.0962 |
| NSFTV_231 | Hunan Early DwarfNo.3   | IND | 0.7857 | 0.3681 |
| NSFTV_235 | Sze Guen Zim            | IND | 0      | 0.0308 |
| NSFTV_252 | Djimoron                | IND | 0.0714 | 0.1291 |
| NSFTV_284 | IR-44595                | IND | 0.6    | 0.2872 |
| NSFTV_298 | LD 24                   | IND | 0.069  | 0.0902 |
| NSFTV_299 | SML 242                 | IND | 0.8333 | 0.3974 |
| NSFTV_313 | BR24                    | IND | 0.3571 | 0.1621 |
| NSFTV_318 | DJ 24                   | IND | 0.069  | 0.1671 |
| NSFTV_356 | JC 117                  | IND | 0      | 0.0085 |
| NSFTV_385 | Nira                    | IND | 0.1389 | 0.1432 |
| NSFTV_620 | Jasmine 85              | IND | 0.7333 | 0.3564 |
| NSFTV_629 | Panda                   | IND | 0.25   | 0.2308 |
| NSFTV_633 | Jing 185-7              | IND | 0.6    | 0.2564 |
| NSFTV_634 | Rondo (4484-1693)       | IND | 0.1071 | 0.0742 |
| NSFTV_616 | RT0034                  | IND | 0.7727 | 0.3147 |
| NSFTV_636 | Sadu Cho                | IND | 0      | 0.0571 |
| NSFTV_642 | Zhenshan 97B(ZS97B)     | IND | 0.8519 | 0.5328 |
| NSFTV_643 | Minghui 63(MH 63)       | IND | 0.6316 | 0.2733 |
| NSFTV_644 | IR64-21                 | IND | 0.8333 | 0.3974 |
| NSFTV_648 | Hunan-Huang-Zhan-2(SHZ) | IND | 0.9286 | 0.4533 |
| NSFTV_8   | Asse Y Pung             | TRJ | 0.7241 | 0.2759 |
| NSFTV_23  | Canella De Ferro        | TRJ | 0.8    | 0.3487 |
| NSFTV_24  | Carolina Gold           | TRJ | 0.9286 | 0.3826 |
| NSFTV_25  | Carolina Gold           | TRJ | 0      | 0      |
| NSFTV_26  | Carolina Gold Sel       | TRJ | 0.0345 | 0.0133 |
| NSFTV_65  | Honduras                | TRJ | 0.7586 | 0.3156 |
| NSFTV_69  | IAC 25                  | TRJ | 0.5455 | 0.1678 |
| NSFTV_73  | IRAT 177                | TRJ | 0.6154 | 0.2101 |
| NSFTV_98  | L-202                   | TRJ | 0.4444 | 0.2735 |
| NSFTV_99  | LAC 23                  | TRJ | 0      | 0      |
| NSFTV_108 | Moroberekan             | TRJ | 0.0455 | 0.021  |
| NSFTV_120 | OS6                     | TRJ | 0.5172 | 0.2387 |
| NSFTV_135 | RT 1031-69              | TRJ | 0.3571 | 0.2115 |
| NSFTV_150 | Sultani                 | TRJ | 0.931  | 0.4881 |
| NSFTV_152 | T 1                     | TRJ | 0      | 0.0026 |
| NSFTV_164 | Tondok                  | TRJ | 0.2414 | 0.2042 |
| NSFTV_165 | Trembese                | TRJ | 0.9677 | 0.4665 |
| NSFTV_183 | Boa Vista               | TRJ | 0.8846 | 0.4586 |
| NSFTV_185 | British Honduras Creole | TRJ | 1      | 0.565  |
| NSFTV_195 | IRAT 13                 | TRJ | 0.8966 | 0.3236 |
| NSFTV_198 | Leah                    | TRJ | 0.8519 | 0.3647 |
| NSFTV_202 | Pratao                  | TRJ | 1      | 0.5256 |
| NSFTV_213 | WC 3397                 | TRJ | 0.9655 | 0.4748 |
| NSFTV_214 | WC 4419                 | TRJ | 0.7586 | 0.2653 |
| NSFTV_215 | WC 4443                 | TRJ | 0.7667 | 0.2923 |
| NSFTV_239 | WAB 502-13-4-1          | TRJ | 0      | 0.0026 |
| NSFTV_240 | WAB 501-11-5-1          | TRJ | 0.7333 | 0.3359 |
| NSFTV_285 | Tox 782-20-1            | TRJ | 0.871  | 0.3573 |
| NSFTV_308 | Llanero 501             | TRJ | 0.8929 | 0.3544 |
| NSFTV_309 | Manzano                 | TRJ | 0.92   | 0.4769 |

|           |                       |     |        |        |
|-----------|-----------------------|-----|--------|--------|
| NSFTV_379 | Wanica                | TRJ | 0.6786 | 0.2967 |
| NSFTV_384 | 318                   | TRJ | 0.5926 | 0.2906 |
| NSFTV_391 | Della                 | TRJ | 0.9    | 0.3256 |
| NSFTV_392 | Edith                 | TRJ | 0.2414 | 0.2095 |
| NSFTV_394 | Lady Wright Seln      | TRJ | 0.9655 | 0.3926 |
| NSFTV_396 | Cocodrie              | TRJ | 0.9032 | 0.4069 |
| NSFTV_397 | Cybonnet              | TRJ | 0.5625 | 0.2596 |
| NSFTV_352 | Guatemala 1021        | TRJ | 0.8966 | 0.4244 |
| NSFTV_375 | Upland                | TRJ | 0.5517 | 0.2573 |
| NSFTV_621 | LaGrue                | TRJ | 1      | 0.6    |
| NSFTV_619 | Rosemont              | TRJ | 0.4    | 0.1667 |
| NSFTV_624 | Kaybonnet             | TRJ | 0.9    | 0.3692 |
| NSFTV_628 | Jefferson             | TRJ | 0.5185 | 0.1909 |
| NSFTV_630 | Saber                 | TRJ | 0.9    | 0.5538 |
| NSFTV_625 | Katy                  | TRJ | 0.6897 | 0.3156 |
| NSFTV_635 | Azucena               | TRJ | 0.9667 | 0.5692 |
| NSFTV_647 | Cypress               | TRJ | 0.963  | 0.4188 |
| NSFTV_177 | 68-2                  | TEJ | 0.75   | 0.4066 |
| NSFTV_158 | Taipei 309            | TEJ | 0.8929 | 0.456  |
| NSFTV_300 | Sml Kapuri            | TEJ | 0.8846 | 0.4172 |
| NSFTV_173 | Nipponbare            | TEJ | 0.16   | 0.0646 |
| NSFTV_283 | Chibica               | TEJ | 0.7308 | 0.3402 |
| NSFTV_151 | Suweon                | TEJ | 0.8    | 0.3577 |
| NSFTV_94  | Koshihikari           | TEJ | 0.2727 | 0.1538 |
| NSFTV_297 | Bahia                 | TEJ | 0.6667 | 0.3795 |
| NSFTV_267 | Hatsunishiki          | TEJ | 0.7391 | 0.3645 |
| NSFTV_250 | Bulgare               | TEJ | 0.6296 | 0.2991 |
| NSFTV_311 | 56-122-23             | TEJ | 0.7059 | 0.3982 |
| NSFTV_133 | Rikuto Kemochi        | TEJ | 0.8667 | 0.541  |
| NSFTV_86  | Kaw Luyoeng           | TEJ | 0.1429 | 0.0769 |
| NSFTV_1   | Agostano              | TEJ | 1      | 0.5165 |
| NSFTV_220 | Azerbaijanica         | TEJ | 0.3478 | 0.2441 |
| NSFTV_306 | WIR 3764              | TEJ | 0.7586 | 0.4005 |
| NSFTV_62  | Gyehwa 3              | TEJ | 0.1613 | 0.1663 |
| NSFTV_186 | Bul Zo                | TEJ | 0.24   | 0.1754 |
| NSFTV_9   | Baber                 | TEJ | 0.9167 | 0.4904 |
| NSFTV_295 | Bombilla              | TEJ | 1      | 0.5449 |
| NSFTV_204 | Razza 77              | TEJ | 0.75   | 0.4038 |
| NSFTV_257 | Agusita               | TEJ | 0.8889 | 0.3789 |
| NSFTV_265 | Vialone               | TEJ | 0.4286 | 0.1978 |
| NSFTV_143 | Shinriki              | TEJ | 0.25   | 0.1282 |
| NSFTV_302 | WIR 3039              | TEJ | 0.0455 | 0.0804 |
| NSFTV_115 | NPE 835               | TEJ | 0.5455 | 0.2902 |
| NSFTV_282 | Triomphe Du Maroc     | TEJ | 0.913  | 0.5385 |
| NSFTV_288 | Italican Carolina     | TEJ | 0.8333 | 0.4295 |
| NSFTV_179 | Bellardone            | TEJ | 0.9643 | 0.2692 |
| NSFTV_180 | Benllokk              | TEJ | 0.6923 | 0.3254 |
| NSFTV_301 | Melanotrix            | TEJ | 0.44   | 0.2431 |
| NSFTV_32  | Chodongji             | TEJ | 0.9444 | 0.5256 |
| NSFTV_192 | Erythroceros Hokkaido | TEJ | 0.6087 | 0.3311 |
| NSFTV_248 | Caucasica             | TEJ | 0.4211 | 0.1741 |
| NSFTV_639 | Nipponbare            | TEJ | 0.1538 | 0.2071 |
| NSFTV_289 | Lusitano              | TEJ | 0.1364 | 0.1224 |
| NSFTV_334 | Lomello               | TEJ | 0.7083 | 0.3462 |
| NSFTV_291 | Toploea 70/76         | TEJ | 0.9259 | 0.4302 |
| NSFTV_263 | Maratelli             | TEJ | 0.8261 | 0.4381 |
| NSFTV_368 | Deokjeokjodo          | TEJ | 0.8333 | 0.4615 |
| NSFTV_233 | Sung Liao 2           | TEJ | 0.25   | 0.2308 |

|           |                         |     |        |        |
|-----------|-------------------------|-----|--------|--------|
| NSFTV_154 | Ta Hung Ku              | TEJ | 0.3448 | 0.2414 |
| NSFTV_296 | Dosel                   | TEJ | 0.6667 | 0.2917 |
| NSFTV_365 | Shirogane               | TEJ | 0.6429 | 0.2802 |
| NSFTV_287 | Zerawchanica Karatalski | TEJ | 0.9    | 0.4231 |
| NSFTV_113 | Norin 20                | TEJ | 0.2727 | 0.1608 |
| NSFTV_281 | Patna                   | TEJ | 0.1    | 0.0808 |
| NSFTV_641 | Tainung 67(TNG67)       | TEJ | 0      | 0.0077 |
| NSFTV_247 | Desvauxii               | TEJ | 0.9    | 0.3885 |
| NSFTV_290 | Amposta                 | TEJ | 0.1579 | 0.166  |
| NSFTV_157 | Tainan Iku 487          | TEJ | 0.5    | 0.3077 |
| NSFTV_118 | Oro                     | TEJ | 0.6087 | 0.2642 |
| NSFTV_225 | Biser 1                 | TEJ | 0.55   | 0.2769 |
| NSFTV_15  | Beonjo                  | TEJ | 0.25   | 0.0923 |
| NSFTV_380 | Tainan-Iku No.512       | TEJ | 0.7333 | 0.2718 |
| NSFTV_245 | Sab Ini                 | TEJ | 0.7    | 0.25   |
| NSFTV_104 | Mansaku                 | TEJ | 0.3158 | 0.1984 |
| NSFTV_219 | Nucleoryza              | TEJ | 0.85   | 0.4346 |

**Supplemental Table S3.** LTGP of randomly selected 30 accessions.

| ID        | LTGP (12°C) | LTGP (15°C) |
|-----------|-------------|-------------|
| NSFTV_633 | 0.60        | 0.91        |
| NSFTV_628 | 0.52        | 0.69        |
| NSFTV_245 | 0.70        | 0.92        |
| NSFTV_203 | 0.76        | 0.41        |
| NSFTV_125 | 0.00        | 0.86        |
| NSFTV_157 | 0.50        | 0.45        |
| NSFTV_178 | 0.69        | 0.83        |
| NSFTV_635 | 0.97        | 0.94        |
| NSFTV_120 | 0.52        | 0.67        |
| NSFTV_132 | 0.00        | 0.88        |
| NSFTV_189 | 0.62        | 0.69        |
| NSFTV_13  | 0.92        | 0.91        |
| NSFTV_44  | 0.15        | 0.91        |
| NSFTV_239 | 0.00        | 1.00        |
| NSFTV_322 | 0.54        | 0.91        |
| NSFTV_26  | 0.03        | 0.93        |
| NSFTV_625 | 0.69        | 0.98        |
| NSFTV_189 | 0.62        | 0.85        |
| NSFTV_233 | 0.25        | 0.89        |
| NSFTV_108 | 0.05        | 0.93        |
| NSFTV_154 | 0.34        | 0.75        |
| NSFTV_296 | 0.67        | 0.84        |
| NSFTV_365 | 0.64        | 0.70        |
| NSFTV_287 | 0.90        | 0.96        |
| NSFTV_113 | 0.27        | 0.70        |
| NSFTV_641 | 0.00        | 0.32        |
| NSFTV_290 | 0.16        | 0.10        |
| NSFTV_118 | 0.61        | 0.87        |
| NSFTV_225 | 0.55        | 0.57        |
| NSFTV_15  | 0.25        | 0.78        |

**Supplemental Table S4.** statistic value of LTGI within varietal groups.

| <b>Groups</b>   | <b>Max</b> | <b>Min</b> | <b>Average</b> |
|-----------------|------------|------------|----------------|
| <i>JAPONICA</i> | 0.6        | 0          | 0.32           |
| <i>INDICA</i>   | 0.62       | 0          | 0.2            |
| <i>Tej</i>      | 0.6        | 0.06       | 0.32           |
| <i>Trj</i>      | 0.6        | 0          | 0.31           |
| <i>Ind</i>      | 0.53       | 0          | 0.18           |
| <i>Aus</i>      | 0.62       | 0          | 0.23           |

**Supplementary Table S5.** Significant SNPs of LTGP, LTGI based on 700k dataset and 44k dataset.

| SNP              | Chromosome | position | p-value  | QTL              | reference                         | index and dataset |
|------------------|------------|----------|----------|------------------|-----------------------------------|-------------------|
| SNP-11.12306350. | 11         | 12770030 | 7.48E-06 | qLTG-11-1/qSCT11 | Jiang et al. 2006/Kim et al. 2014 | LTGI/ALL          |
| SNP-1.30553988.  | 1          | 30555033 | 1.30E-05 | qLVG-1           | Chen et al. 2006                  |                   |
| SNP-5.15846104.  | 5          | 15903564 | 1.47E-05 | qLVG5            | Han et al. 2006                   |                   |
| SNP-12.6717912.  | 12         | 6719023  | 1.59E-05 |                  |                                   |                   |
| SNP-1.10721450.  | 1          | 10722475 | 1.98E-05 |                  |                                   |                   |
| SNP-10.11494085. | 10         | 11565267 | 2.55E-05 | qLTG-10          | Jiang et al. 2006                 |                   |
| SNP-2.489904.    | 2          | 489905   | 3.05E-05 |                  |                                   |                   |
| SNP-9.22542045.  | 9          | 22542527 | 3.39E-05 |                  |                                   |                   |
| SNP-3.3410668.   | 3          | 3411673  | 3.64E-05 |                  |                                   |                   |
| SNP-2.7783346.   | 2          | 7783348  | 3.81E-05 |                  |                                   |                   |
| SNP-8.3108386.   | 8          | 3109384  | 3.97E-05 |                  |                                   |                   |
| SNP-4.20466240.  | 4          | 20638198 | 4.01E-05 |                  |                                   |                   |
| SNP-8.3114101.   | 8          | 3115099  | 4.40E-05 |                  |                                   |                   |
| SNP-1.30416673.  | 1          | 30417718 | 4.68E-05 | qLTG-1           | Chen et al. 2006                  |                   |
| SNP-7.26278120.  | 7          | 26279115 | 4.93E-05 | qLVG7-2          | Han et al. 2006                   |                   |
| SNP-12.25114399. | 12         | 25147946 | 5.31E-05 |                  |                                   |                   |
| SNP-8.3097042.   | 8          | 3098040  | 6.23E-05 |                  |                                   |                   |
| SNP-9.22541472.  | 9          | 22541954 | 6.36E-05 |                  |                                   |                   |
| SNP-3.24464619.  | 3          | 24466541 | 6.37E-05 |                  |                                   |                   |
| SNP-9.22541232.  | 9          | 22541714 | 6.42E-05 |                  |                                   |                   |
| SNP-5.16324989.  | 5          | 16382508 | 7.01E-05 |                  |                                   |                   |
| SNP-2.19497594.  | 2          | 19503463 | 7.13E-05 |                  |                                   |                   |
| SNP-11.4219309.  | 11         | 4223408  | 7.27E-05 | qLVG11           | Han et al. 2006                   |                   |
| SNP-9.22844340.  | 9          | 22844822 | 7.34E-05 |                  |                                   |                   |
| SNP-1.23843134.  | 1          | 23844179 | 7.38E-05 |                  |                                   |                   |
| SNP-9.22541111.  | 9          | 22541593 | 7.96E-05 |                  |                                   |                   |
| SNP-9.22512729.  | 9          | 22513211 | 8.39E-05 |                  |                                   |                   |
| SNP-5.20140745.  | 5          | 20203273 | 8.87E-05 |                  |                                   |                   |
| SNP-12.22744562. | 12         | 22778124 | 9.14E-05 |                  |                                   |                   |
| SNP-11.6595377.  | 11         | 6599625  | 9.25E-05 |                  |                                   |                   |
| SNP-11.16013664. | 11         | 16478788 | 9.44E-05 |                  |                                   |                   |
| SNP-11.3673951.  | 11         | 3678050  | 9.48E-05 |                  |                                   |                   |
| SNP-2.489904.    | 2          | 489905   | 4.20E-06 |                  |                                   |                   |
| SNP-11.12306350. | 11         | 12770030 | 7.83E-06 | qLTG-11-1/qSCT11 | Jiang et al. 2006/Kim et al. 2014 | LTGP/ALL          |
| SNP-12.6717912.  | 12         | 6719023  | 2.71E-05 |                  |                                   |                   |
| SNP-12.25114399. | 12         | 25147946 | 3.35E-05 |                  |                                   |                   |
| SNP-7.22916319.  | 7          | 22917313 | 4.44E-05 | qLVG7-2          | Han et al. 2006                   |                   |
| SNP-7.1026437.   | 7          | 1027438  | 4.61E-05 |                  |                                   |                   |
| SNP-1.27481758.  | 1          | 27482803 | 4.85E-05 |                  |                                   |                   |
| SNP-9.22542045.  | 9          | 22542527 | 4.96E-05 |                  |                                   |                   |
| SNP-4.16987686.  | 4          | 17159646 | 5.09E-05 |                  |                                   |                   |
| SNP-8.22690109.  | 8          | 22692823 | 5.80E-05 |                  |                                   |                   |
| SNP-9.9087401.   | 9          | 9088403  | 6.09E-05 | clr9/qLTG-9      | Oh et al. 2004/ Li et al. 2013    |                   |
| SNP-10.15677128. | 10         | 15748359 | 6.23E-05 | qCTSS-10         | Yang et al. 2013                  |                   |
| SNP-10.11494085. | 10         | 11565267 | 6.46E-05 | qLTG-10          | Jiang et al. 2006                 |                   |
| SNP-9.22541472.  | 9          | 22541954 | 6.82E-05 |                  |                                   |                   |
| SNP-3.3410668.   | 3          | 3411673  | 7.15E-05 |                  |                                   |                   |
| SNP-11.3673951.  | 11         | 3678050  | 8.55E-05 | qLVG11           | Han et al. 2006                   |                   |
| SNP-1.21971200.  | 1          | 21972246 | 8.60E-05 |                  |                                   |                   |
| SNP-7.22920799.  | 7          | 22921793 | 8.63E-05 |                  |                                   |                   |
| SNP-5.15846104.  | 5          | 15903564 | 9.27E-05 | qLVG5            | Han et al. 2006                   |                   |
| SNP-7.28369125.  | 7          | 28370118 | 9.46E-05 | qLVG7-2          | Han et al. 2006                   |                   |
| SNP-2.10198335.  | 2          | 10198338 | 9.81E-05 |                  |                                   |                   |
| SNP-1.42375726.  | 1          | 42376771 | 9.96E-05 |                  |                                   |                   |
| SNP-5.15846104.  | 5          | 15903564 | 3.54E-05 | qLVG5            | Han et al. 2006                   |                   |
| SNP-9.22542045.  | 9          | 22542527 | 5.01E-05 |                  |                                   |                   |
| SNP-1.10721450.  | 1          | 10722475 | 7.53E-05 |                  |                                   |                   |
| SNP-7.26278120.  | 7          | 26279115 | 7.76E-05 | qLVG7-2          | Han et al. 2006                   |                   |
| SNP-11.12306350. | 11         | 12770030 | 3.20E-05 | qLTG-11-1/qSCT11 | Jiang et al. 2006/Kim et al. 2014 | LTGI/JAPONICA     |
| SNP-7.26579710.  | 7          | 26580705 | 4.32E-05 | qLVG7-2          | Han et al. 2006                   |                   |
| SNP-5.7231674.   | 5          | 7231733  | 6.92E-05 |                  |                                   | LTGP/INDICA       |
| SNP-11.1093268.  | 11         | 1094268  | 6.51E-05 |                  |                                   |                   |
| SNP-7.9177807.   | 7          | 9178802  | 6.56E-05 |                  |                                   |                   |
| SNP-9.22542045.  | 9          | 22542527 | 7.10E-05 |                  |                                   | LTGP/INDICA       |
| SNP-3.3410668.   | 3          | 3411673  | 7.75E-05 |                  |                                   |                   |
| SNP-2.17728086.  | 2          | 17733957 | 1.15E-05 | qCTS2            |                                   | LTGP/JAPONICA     |
| SNP-11.12306350. | 11         | 12770030 | 1.15E-05 | qLTG-11-1/qSCT11 | Jiang et al. 2006/Kim et al. 2014 |                   |
| SNP-7.22916319.  | 7          | 22917313 | 5.94E-05 | qLVG7-2          | Han et al. 2006                   |                   |
| SNP-1.31936826.  | 1          | 31937871 | 7.00E-05 | qCTSS-1          |                                   |                   |
| SNP-12.17348503. | 12         | 17354549 | 7.50E-05 | qGR-12           |                                   |                   |
| SNP-7.8622202.   | 7          | 8623198  | 8.70E-05 |                  |                                   |                   |
| SNP-5.22739346.  | 5          | 22801905 | 9.24E-05 | qLTG-5-2         |                                   |                   |



|            |    |          |          |                  |                                     |          |
|------------|----|----------|----------|------------------|-------------------------------------|----------|
| id11006306 | 11 | 17467775 | 1.24E-05 | qLTG-11-1/qSCT11 | Jiang et al., 2006/Kim et al., 2014 | LTGP,44k |
| id7003987  | 7  | 22881924 | 7.04E-05 | qLVG7-2          | Han et al.,2006                     | LTGP,44k |
| id9007765  | 9  | 22531470 | 5.66E-05 |                  |                                     | LTGI,44k |
| id8000984  | 8  | 3108387  | 6.39E-05 |                  |                                     |          |
| id2007618  | 2  | 19505884 | 8.88E-05 | qCTS2            | Liu et al., 2013                    |          |

**Supplementary Table S6.** Different SNPs associated with LTG

| SNP              | Chromosome | position | p-value  | QTL              | reference                           |
|------------------|------------|----------|----------|------------------|-------------------------------------|
| SNP-2.489904.    | 2          | 489905   | 4.20E-06 |                  |                                     |
| SNP-11.12306350. | 11         | 12770030 | 7.83E-06 | qLTG-11-1/qSCT11 | Jiang et al. 2006/Kim et al. 2014   |
| SNP-12.6717912.  | 12         | 6719023  | 2.71E-05 |                  |                                     |
| SNP-12.25114399. | 12         | 25147946 | 3.35E-05 |                  |                                     |
| SNP-7.22916319.  | 7          | 22917313 | 4.44E-05 | qLVG7-2          | Han et al. 2006                     |
| SNP-7.1026437.   | 7          | 1027438  | 4.61E-05 |                  |                                     |
| SNP-1.27481758.  | 1          | 27482803 | 4.85E-05 |                  |                                     |
| SNP-9.22542045.  | 9          | 22542527 | 4.96E-05 |                  |                                     |
| SNP-4.16987686.  | 4          | 17159646 | 5.09E-05 |                  |                                     |
| SNP-8.22690109.  | 8          | 22692823 | 5.80E-05 | qSV8-1           | Zhang et al. 2005                   |
| SNP-9.9087401.   | 9          | 9088403  | 6.09E-05 | clr9/qLTG-9      | Oh et al. 2004/ Li et al. 2013      |
| SNP-10.15677128. | 10         | 15748359 | 6.23E-05 | qCTSS-10         | Yang et al. 2013                    |
| SNP-10.11494085. | 10         | 11565267 | 6.46E-05 | qLTG-10          | Jiang et al. 2006                   |
| SNP-9.22541472.  | 9          | 22541954 | 6.82E-05 |                  |                                     |
| SNP-3.3410668.   | 3          | 3411673  | 7.15E-05 |                  |                                     |
| SNP-11.3673951.  | 11         | 3678050  | 8.55E-05 | qLVG11           | Han et al. 2006                     |
| SNP-1.21971200.  | 1          | 21972246 | 8.60E-05 |                  |                                     |
| SNP-7.22920799.  | 7          | 22921793 | 8.63E-05 |                  |                                     |
| SNP-5.15846104.  | 5          | 15903564 | 9.27E-05 | qLVG5            | Han et al. 2006                     |
| SNP-7.28369125.  | 7          | 28370118 | 9.46E-05 | qLVG7-2          | Han et al. 2006                     |
| SNP-2.10198335.  | 2          | 10198338 | 9.81E-05 |                  |                                     |
| SNP-1.42375726.  | 1          | 42376771 | 9.96E-05 |                  |                                     |
| SNP-1.30553988.  | 1          | 30555033 | 1.30E-05 | qLVG-1           | Chen et al. 2006                    |
| SNP-1.10721450.  | 1          | 10722475 | 1.98E-05 |                  |                                     |
| SNP-2.7783346.   | 2          | 7783348  | 3.81E-05 |                  |                                     |
| SNP-8.3108386.   | 8          | 3109384  | 3.97E-05 |                  |                                     |
| SNP-4.20466240.  | 4          | 20638198 | 4.01E-05 |                  |                                     |
| SNP-8.3114101.   | 8          | 3115099  | 4.40E-05 |                  |                                     |
| SNP-1.30416673.  | 1          | 30417718 | 4.68E-05 | qLTG-1           | Chen et al. 2006                    |
| SNP-7.26278120.  | 7          | 26279115 | 4.93E-05 | qLVG7-2          | Han et al. 2006                     |
| SNP-8.3097042.   | 8          | 3098040  | 6.23E-05 |                  |                                     |
| SNP-3.24464619.  | 3          | 24466541 | 6.37E-05 |                  |                                     |
| SNP-5.16324989.  | 5          | 16382508 | 7.01E-05 |                  |                                     |
| SNP-2.19497594.  | 2          | 19503463 | 7.13E-05 |                  |                                     |
| SNP-11.4219309.  | 11         | 4223408  | 7.27E-05 | qLVG11           | Han et al. 2006                     |
| SNP-9.22844340.  | 9          | 22844822 | 7.34E-05 |                  |                                     |
| SNP-1.23843134.  | 1          | 23844179 | 7.38E-05 |                  |                                     |
| SNP-9.22541111.  | 9          | 22541593 | 7.96E-05 |                  |                                     |
| SNP-9.22512729.  | 9          | 22513211 | 8.39E-05 |                  |                                     |
| SNP-5.20140745.  | 5          | 20203273 | 8.87E-05 |                  |                                     |
| SNP-12.22744562. | 12         | 22778124 | 9.14E-05 |                  |                                     |
| SNP-11.6595377.  | 11         | 6599625  | 9.25E-05 |                  |                                     |
| SNP-11.16013664. | 11         | 16478788 | 9.44E-05 |                  |                                     |
| SNP-7.26579710.  | 7          | 26580705 | 4.32E-05 | qLVG7-2          | Han et al. 2006                     |
| SNP-5.7231674.   | 5          | 7231733  | 6.92E-05 |                  |                                     |
| SNP-2.17728086.  | 2          | 17733957 | 1.15E-05 | qCTS2            |                                     |
| SNP-1.31936826.  | 1          | 31937871 | 7.00E-05 | qCTSS-1          |                                     |
| SNP-12.17348503. | 12         | 17354549 | 7.50E-05 | qGR-12           |                                     |
| id11006306       | 11         | 17467775 | 1.24E-05 | qLTG-11-1/qSCT11 | Jiang et al., 2006/Kim et al., 2014 |
| id7003987        | 7          | 22881924 | 7.04E-05 | qLVG7-2          | Han et al.,2006                     |
| id9007765        | 9          | 22531470 | 5.66E-05 |                  |                                     |
| id8000984        | 8          | 3108387  | 6.39E-05 |                  |                                     |
| id2007618        | 2          | 19505884 | 8.88E-05 | qCTS2            | Liu et al., 2013                    |

**Supplemental Table 7.** Information for the primers used in this study.

| <b>Primer name</b>   | <b>Sequence (5' to 3')</b>   | <b>Comment</b>           |
|----------------------|------------------------------|--------------------------|
| <i>OsSAP16qRT-F</i>  | CAAAGAACAACACTGCCTGAAGCATAGA | qRT-PCR                  |
| <i>OsSAP16qRT-R</i>  | ACTCGTTGCTGCGGTAAGAAGAC      |                          |
| <i>OsSAP16smRT-F</i> | AAACATCACCTGGGACACCC         | Semi-quantitative RT-PCR |
| <i>OsSAP16smRT-R</i> | ACATCGACCGTCACTCTGCTA        |                          |
| <i>sap1-LP</i>       | CGTCTTCGTAACGGTCTCCC         | Genotype                 |
| <i>sap1-RP</i>       | TGGATCACTGTCCTAAAGGCTAAA     |                          |
| <i>sap1-LB</i>       | ATAGGGTTTCGCTCATGTGTTGAGCAT  |                          |
| <i>sap2-LP</i>       | CCTTTCGGTGATGCTCTTG          | Genotype                 |
| <i>sap2-RP</i>       | TTCTGGATGGCTTGGGTAG          |                          |
| <i>sap2-LB</i>       | AATCCAGATCCCCGAATTA          |                          |
| <i>sap3-LP</i>       | ACAATGGCTTGCCTTGAAAC         | Genotype                 |
| <i>sap3-RP</i>       | AGGCTGCATATATCCGGTTG         |                          |
| <i>sap3-LB</i>       | CCACAGTTTTTCGCGATCCAGACTG    |                          |

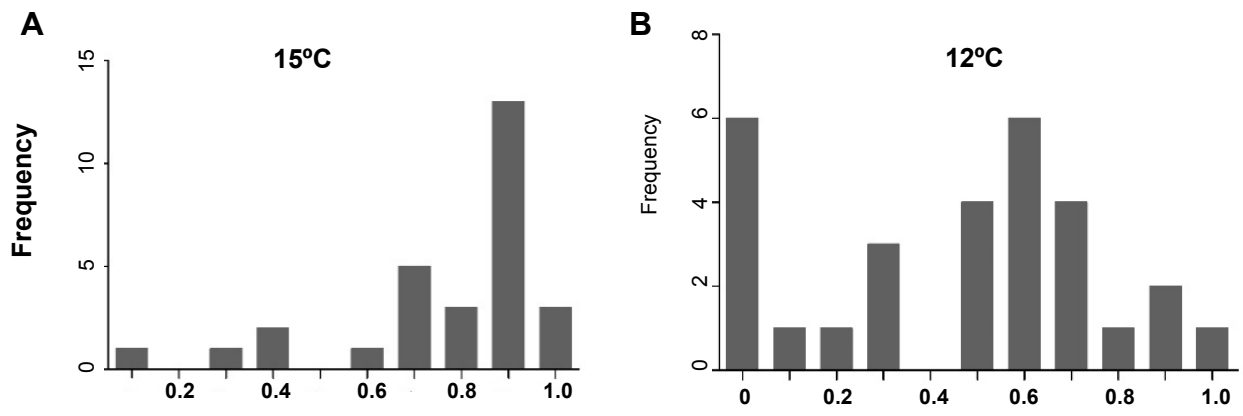

**Supplemental Figure S1.** Frequency distribution of LTGP of randomly selected 30 accessions under 15°C (A) and 12°C (B).

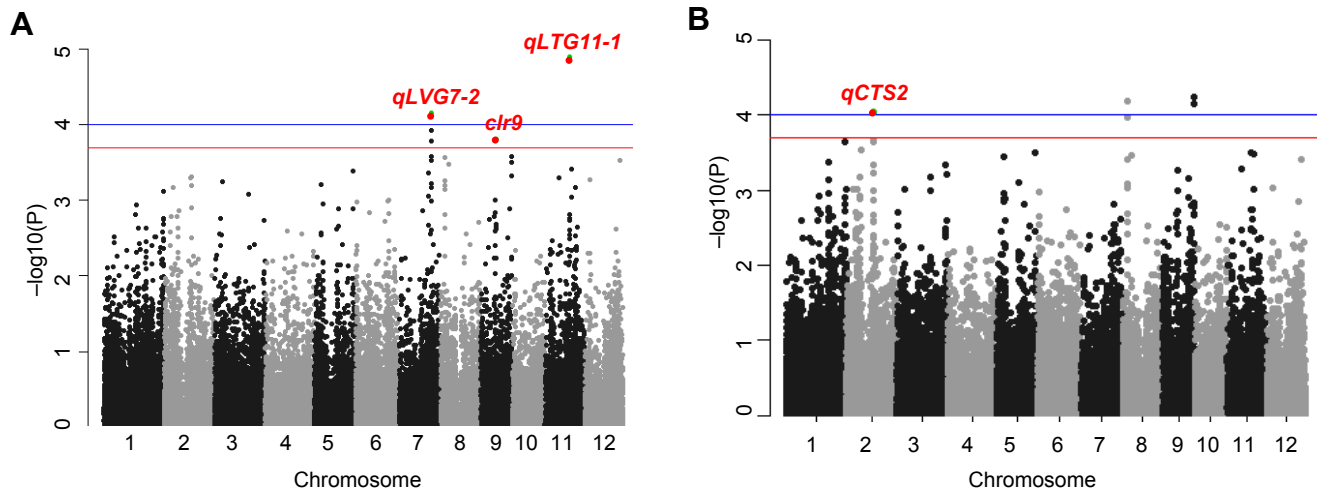

**Supplemental Figure S2.** Manhattan plots of GWAS on LTGP and LTGI using the 44k dataset. Manhattan plots of LTGP (A) and LTGI (B). Red points represent the SNPs located in the reported QTLs. The blue line indicates the significant threshold set at  $p=1.0 \times 10^{-4}$  and the red line represents the minor significance threshold with  $p=2 \times 10^{-4}$ .

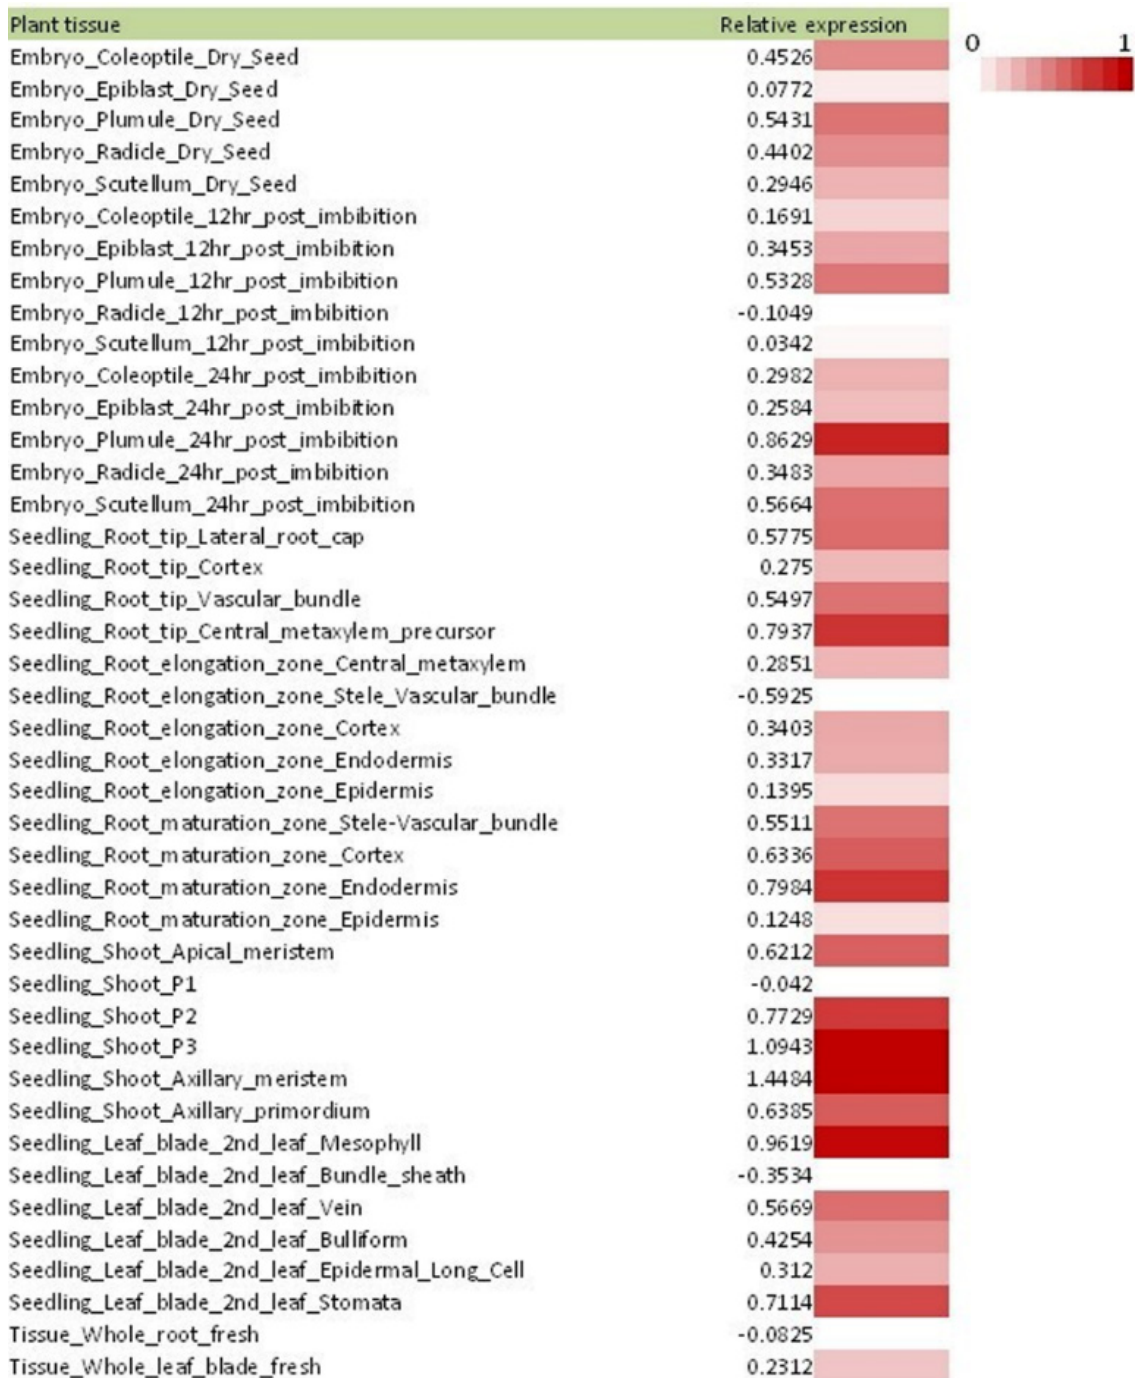

**Supplemental Figure S3.** Relative expression of *OsSAP16* in different cell types and plant tissues of rice. Data is captured from ROAD (<http://www.ricearray.org/>).

Dataset: 760 perturbations from data selection: OS\_AFFY\_RICE-1

Showing 1 measure(s) of 1 gene(s) on selection: OS-0

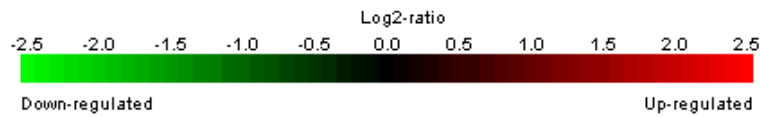

760 of 760 perturbations fulfilled the filter criteria

Filter values for ● OS07G0569700

|                                                                                  | no filter  |             | no filter |
|----------------------------------------------------------------------------------|------------|-------------|-----------|
|                                                                                  | Log2-ratio | Fold-Change | p-value   |
| <b>Oryza sativa (760)</b>                                                        |            |             |           |
| germination (4h) / embryo samples from dry seeds (Nipponbare)                    | 1.75       | 3.36        | <0.001    |
| diurnal study 2 (4:00pm day 2) / diurnal study 2 (8:00am day 2)                  | 1.72       | 3.28        | 0.005     |
| germination (24h) / embryo samples from dry seeds (Nipponbare)                   | 1.64       | 3.10        | 0.001     |
| germination (16h) / embryo samples from dry seeds (Nipponbare)                   | 1.63       | 3.08        | 0.001     |
| anaerobic germination (3h) / anaerobic germination (1h)                          | 1.58       | 2.91        | 0.003     |
| cold study 10 (IR29) / untreated leaf samples (IR29)                             | 1.45       | 2.82        | 0.005     |
| germination (12h) / embryo samples from dry seeds (Nipponbare)                   | 1.45       | 2.73        | 0.003     |
| cold study 10 (LTH) / untreated leaf samples (LTH)                               | 1.41       | 2.68        | <0.001    |
| cold study 2 (Huahui 1) / untreated leaf samples (Huahui 1)                      | 1.35       | 2.55        | <0.001    |
| non-aromatic RILs / Pusa 1342                                                    | 1.30       | 2.48        | <0.001    |
| heat study 2 (Huahui 1) / untreated leaf samples (Huahui 1)                      | 1.28       | 2.42        | <0.001    |
| germination (8h) / embryo samples from dry seeds (Nipponbare)                    | 1.27       | 2.41        | 0.002     |
| cold study 2 (MH63) / untreated leaf samples (MH63)                              | 1.27       | 2.41        | <0.001    |
| aerobic germination study 2 (3h) / embryo samples from dry seeds (Amaroo)        | 1.24       | 2.37        | 0.001     |
| A. tumefaciens (Nipponbare) / untreated calli samples (Nipponbare)               | 1.23       | 2.34        | 0.036     |
| heat study 2 (MH63) / untreated leaf samples (MH63)                              | 1.20       | 2.30        | <0.001    |
| diurnal study 2 (4:00pm day 1) / diurnal study 2 (8:00am day 1)                  | 1.14       | 2.17        | 0.055     |
| PR 319 / PMS 80                                                                  | 1.12       | 2.15        | 0.002     |
| aerobic germination study 2 (24h) / embryo samples from dry seeds (Amaroo)       | 1.10       | 2.14        | <0.001    |
| A. tumefaciens study 2 (Nipponbare) / untreated calli samples (Nipponbare)       | 1.06       | 2.06        | 0.044     |
| diurnal study 2 (12:00am day 1) / diurnal study 2 (8:00am day 1)                 | 1.00       | 1.97        | 0.071     |
| A. tumefaciens (6h) / untreated calli samples                                    | 0.97       | 1.95        | 0.009     |
| A. tumefaciens (1h) / untreated calli samples                                    | 0.96       | 1.95        | 0.010     |
| X. oryzae pv. oryzae T7174 (Nipponbare) / mock treated leaf samples (Nipponbare) | 0.96       | 1.97        | 0.006     |
| cold study 11 (LTH) / untreated leaf samples (LTH)                               | 0.95       | 1.93        | <0.001    |
| non-aromatic RILs / Pusa 1121                                                    | 0.91       | 1.86        | 0.001     |
| Pusa 1266 / Pusa Basmati 1                                                       | 0.90       | 1.87        | 0.001     |
| aerobic germination study 2 (12h) / embryo samples from dry seeds (Amaroo)       | 0.89       | 1.86        | <0.001    |
| M. grisea (4dpi) / mock treated leaf samples (4dpi)                              | 0.89       | 1.85        | 0.006     |
| cold study 11 (IR29) / untreated leaf samples (IR29)                             | 0.89       | 1.85        | <0.001    |
| sp15 / Zhefu802                                                                  | 0.88       | 1.84        | 0.034     |
| MRP 5401 / PMS 80                                                                | 0.87       | 1.82        | <0.001    |
| cold study 12 (LTH) / untreated leaf samples (LTH)                               | 0.85       | 1.82        | 0.002     |

**Supplemental Figure S4.** Gene expression profiles of *OsSAP16* from GENEVESTIGATOR (<https://en.wikipedia.org/wiki/Genevestigator>).

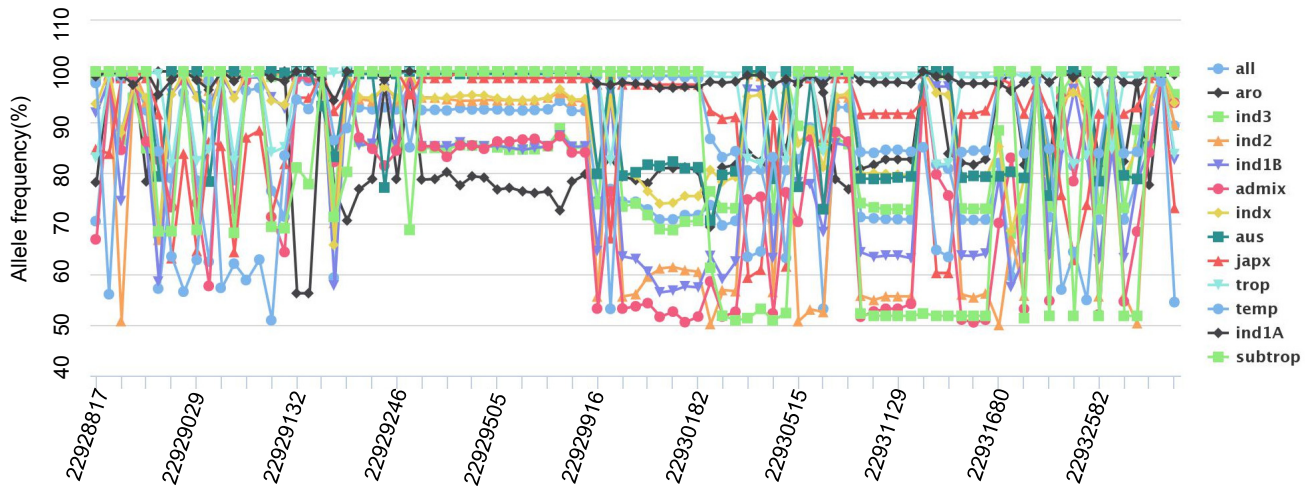

**Supplemental Figure S5.** SNPs located in *OsSAP16* across the 2945 rice varieties based on IRIC (<http://www.oryzasnp.org/>).



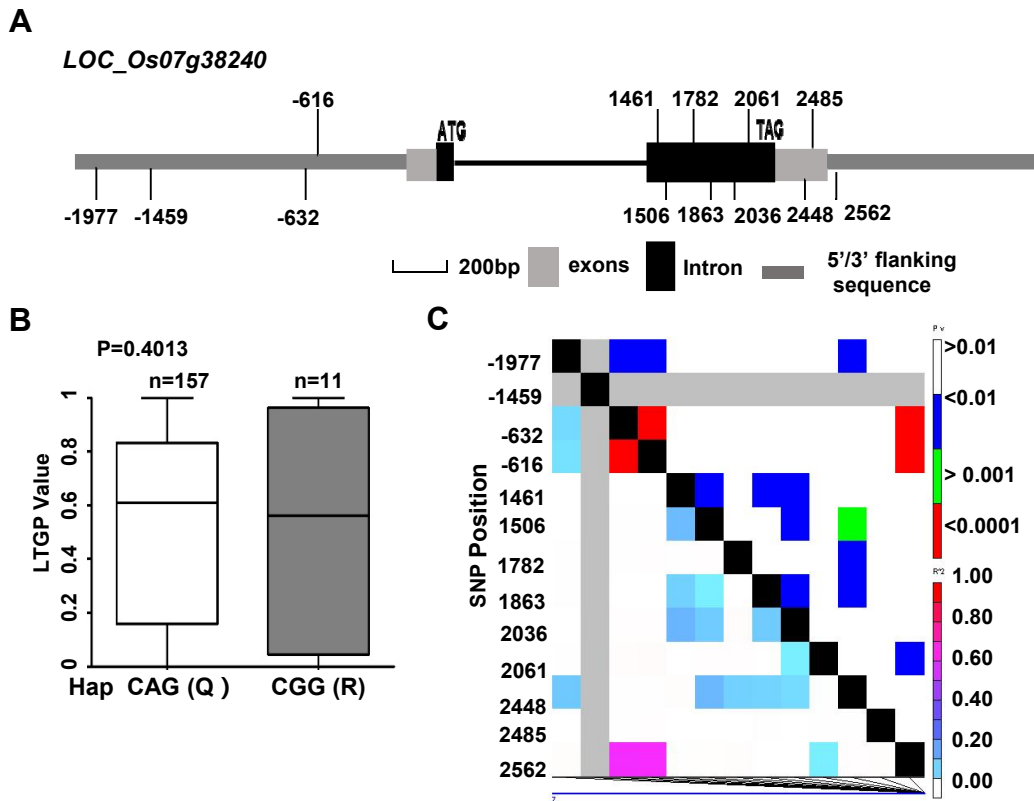

**Supplemental Figure S6.** SNPs of the *OsSAP16* gene present in the 700k dataset.

A, DNA polymorphism in the *OsSAP16* gene. Position is defined relative to the transcription start site.

B, Boxplot of LTGI based on the two haplotypes at the 2036 bp 5' to the transcription start site. A is part of CAG codon for phenylalanine and G is part of the CGG codon for Arginine.

C, LD plot of the 13 SNPs in *OsSAP16*. Upper triangle is P-Value and lower triangle is R squared.

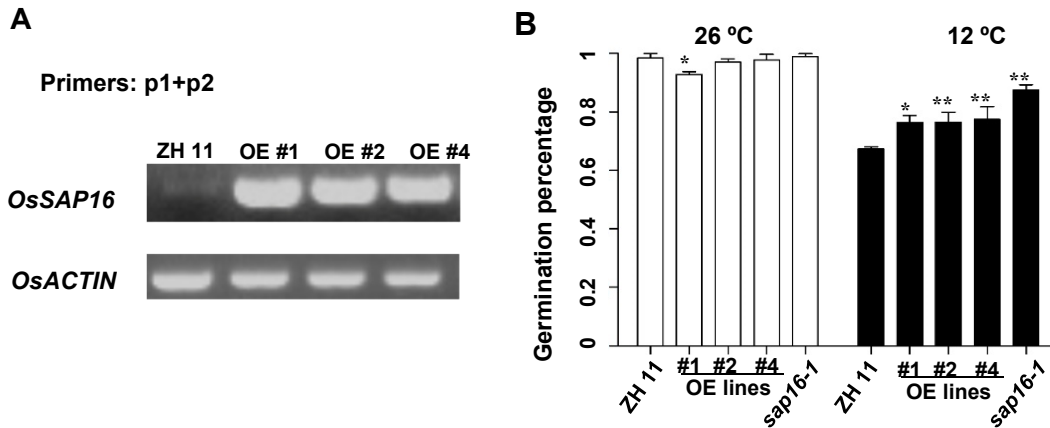

**Supplemental Figure S7. Phenotypes of *OsSAP16* overexpression lines.**

A, Semi-quantitative RT-PCR analysis of *OsSAP16* expression in overexpression lines. The *OsACTIN* gene was used as a normalization control. Shown are products from 28 cycles of amplification for *OsACTIN* and *OsSAP16* in all samples.

B, Germinability of wild-type Zhonghua11 (ZH11), OE lines, and *sap16-1* under low (12°C) and normal (26°C) temperature growth condition. Seeds incubated for 3 days under 26°C and 13 days under 12°C. All data in the graph are means  $\pm$  s.d. from three replicates. Differences of mutants compared to wild types were analyzed by Welch's t-test. \*P < 0.05, \*\*P < 0.01.

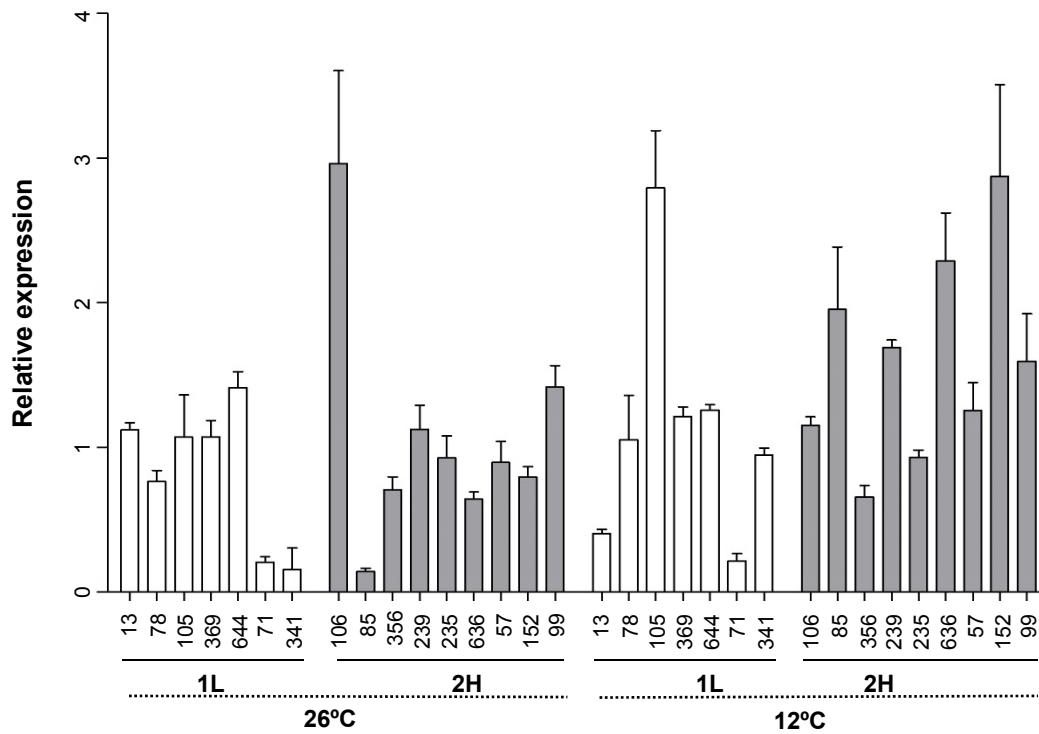

**Supplemental Figure S8.** Relative expressions of *OsSAP16* in imbibed seeds of various accessions after two days in dark at 12°C and 26°C respectively. 1H represents Hap1 with high LTG, 2L represents Hap2 with low LTG, 1L represents Hap1 with low LTG, 2H represents Hap2 with high LTG. Only the number part of the accession name of RDP1 is shown, e.g., 13 represents NSFTV\_13. All data in the graph are means  $\pm$  s.d. from three replicates.

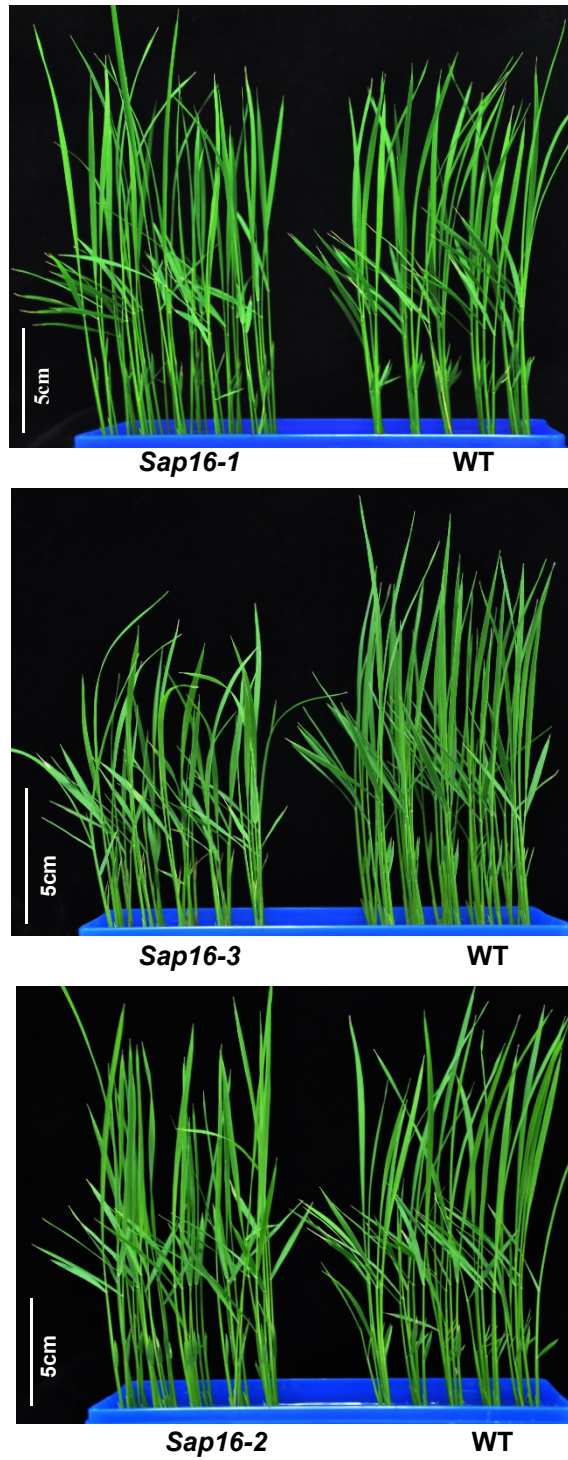

**Supplemental Figure S9.** *OsSAP16* mutants and wild type (WT) grown at 26°C for 14 days in 0.35% agar.
